# Supplementary material for: Do Rib-Based Anchors Impair Chest Wall Motion in Early Onset Scoliosis (EOS)?
Source: bioRxiv or medRxiv preprint supplement (doi:10.1101/2024.05.01.24306556), 2024-05-03
Supplement: Supplementary file [file media-1.pdf]

**Table S1: Global comparisons of tidal volumes (in cc) of MTC subgroup of EOS patients before and after surgery without distinguishing concave and convex sides of spinal curve. Each cell shows mean (upper number) and standard deviation (SD) (lower number) values. P values (pre-surgical vs. post-surgical) are shown using paired t-testing. Ratio r = ((post-pre)/pre) x 100%.**

|              | Without age correction |                |                |                |                |                | With age correction |                |                |                |                |                |
|--------------|------------------------|----------------|----------------|----------------|----------------|----------------|---------------------|----------------|----------------|----------------|----------------|----------------|
| <b>EOS</b>   | LLtv                   | RLtv           | LCWtv          | RCWtv          | LDtv           | RDtv           | LLtv                | RLtv           | LCWtv          | RCWtv          | LDtv           | RDtv           |
| <b>Pre</b>   | 31.63<br>19.05         | 41.94<br>22.87 | 20.64<br>13.15 | 24.41<br>13.25 | 12.28<br>7.90  | 19.45<br>12.01 | 46.91<br>20.24      | 44.58<br>23.39 | 25.56<br>12.57 | 23.29<br>8.96  | 25.01<br>9.86  | 25.28<br>13.37 |
| <b>Post</b>  | 49.43<br>24.76         | 70.80<br>36.02 | 31.10<br>15.42 | 38.45<br>19.45 | 20.17<br>12.80 | 36.91<br>20.43 | 58.74<br>33.22      | 61.50<br>32.25 | 34.99<br>18.66 | 34.55<br>17.19 | 27.58<br>19.60 | 29.50<br>18.47 |
| <b>r (%)</b> | 56.28                  | 68.81          | 50.68          | 57.52          | 64.25          | 89.77          | 25.22               | 37.95          | 36.89          | 48.35          | 10.28          | 16.69          |
| <b>p</b>     | 0.004                  | <0.001         | 0.007          | 0.001          | 0.006          | <0.001         | 0.071               | 0.005          | 0.034          | 0.001          | 0.427          | 0.224          |

MTC – main thoracic curve; EOS – early onset scoliosis; LLtv – left lung tidal volume; RLtv – right lung tidal volume; LCWtv – left chest wall tidal volume; RCWtv – right chest wall tidal volume; LDtv – left hemi-diaphragm tidal volume; RDtv – right hemi-diaphragm tidal volume.
