# Supplementary material for: Do Rib-Based Anchors Impair Chest Wall Motion in Early Onset Scoliosis (EOS)?
Source: bioRxiv or medRxiv preprint supplement (doi:10.1101/2024.05.01.24306556), 2024-05-03
Supplement: Supplementary file [file media-2.pdf]

**Table S2: Global comparisons of tidal volumes (in cc) of TLC+LC subgroups of EOS patients before and after surgery without distinguishing concave and convex sides of spinal curve. Each cell shows mean (upper number) and standard deviation (SD) (lower number) values. P values (pre-surgical vs. post-surgical) are shown using paired t-testing. Ratio  $r = ((\text{post-pre})/\text{pre}) \times 100\%$ .**

|              | Without age correction |       |       |       |       |       | With age correction |       |       |       |        |       |
|--------------|------------------------|-------|-------|-------|-------|-------|---------------------|-------|-------|-------|--------|-------|
| <b>EOS</b>   | LLtv                   | RLtv  | LCWtv | RCWtv | LDtv  | RDtv  | LLtv                | RLtv  | LCWtv | RCWtv | LDtv   | RDtv  |
| <b>Pre</b>   | 41.97                  | 74.71 | 27.87 | 40.39 | 16.43 | 35.30 | 50.98               | 87.62 | 35.04 | 44.89 | 24.75  | 50.38 |
|              | 27.67                  | 48.35 | 19.84 | 27.37 | 8.62  | 23.72 | 27.44               | 46.51 | 20.11 | 26.82 | 11.10  | 22.64 |
| <b>Post</b>  | 52.87                  | 91.35 | 33.88 | 41.71 | 20.77 | 51.92 | 52.87               | 91.35 | 33.88 | 41.71 | 20.77  | 51.92 |
|              | 34.27                  | 59.15 | 23.39 | 27.03 | 13.78 | 33.74 | 34.27               | 59.15 | 23.39 | 27.03 | 13.78  | 33.74 |
| <b>r (%)</b> | 25.98                  | 22.27 | 21.53 | 3.28  | 26.37 | 47.08 | 3.72                | 4.26  | -3.32 | -7.07 | -16.10 | 3.06  |
| <b>p</b>     | 0.015                  | 0.087 | 0.042 | 0.770 | 0.102 | 0.008 | 0.681               | 0.683 | 0.697 | 0.473 | 0.172  | 0.774 |

MTC – main thoracic curve; EOS – early onset scoliosis; LLtv – left lung tidal volume; RLtv – right lung tidal volume; LCWtv – left chest wall tidal volume; RCWtv – right chest wall tidal volume; LDtv – left hemi-diaphragm tidal volume; RDtv – right hemi-diaphragm tidal volume.
